# Supplementary material for: Mode of Delivery, Prolonged Breastfeeding and Diet as Predictors of Severe Early Childhood Caries: a Multicenter Study in Children Under 3 Years
Source: Research Square preprint supplement (doi:10.21203/rs.3.rs-7594850/v1), 2025-09-23
Supplement: Supplementary file 1 [file 6e15cb17a05f2d05cabf70a0.docx]

**Supplementary Material** – Regression Analyses on Mode of Delivery, Breastfeeding, and Diet on Severe-Early Childhood Caries.

| **Correlations** | | | | | | | | | | | | |
| --- | --- | --- | --- | --- | --- | --- | --- | --- | --- | --- | --- | --- |
|  | | S-ECC | Sex | Age | Nationality | Mode of delivery | Exclusive breastfeeding | Breastfeeding (days) | Bottle | Cariogenic diet | Number of brushings | Fluoride toothpaste |
| Pearson Correlation | S-ECC | 1.000 | -0.010 | 0.286 | -0.140 | 0.088 | 0.152 | 0.304 | -0.147 | 0.189 | 0.121 | 0.191 |
| Sex | -0.010 | 1.000 | 0.025 | -0.031 | 0.025 | -0.034 | 0.040 | -0.013 | 0.055 | -0.022 | -0.006 |
| Age | 0.286 | 0.025 | 1.000 | 0.130 | -0.010 | 0.095 | 0.358 | -0.152 | 0.332 | 0.352 | 0.364 |
| Nationality | -0.140 | -0.031 | 0.130 | 1.000 | -0.291 | 0.033 | 0.185 | 0.163 | 0.129 | 0.180 | -0.233 |
| Mode of delivery | 0.088 | 0.025 | -0.010 | -0.291 | 1.000 | 0.013 | 0.033 | -0.047 | -0.028 | -0.023 | 0.129 |
| Exclusive breastfeeding | 0.152 | -0.034 | 0.095 | 0.033 | 0.013 | 1.000 | 0.583 | -0.175 | 0.007 | 0.014 | 0.111 |
| Breastfeeding (days) | 0.304 | 0.040 | 0.358 | 0.185 | 0.033 | 0.583 | 1.000 | -0.274 | 0.157 | 0.165 | 0.129 |
| Bottle | -0.147 | -0.013 | -0.152 | 0.163 | -0.047 | -0.175 | -0.274 | 1.000 | -0.046 | -0.046 | -0.146 |
| Cariogenic diet | 0.189 | 0.055 | 0.332 | 0.129 | -0.028 | 0.007 | 0.157 | -0.046 | 1.000 | 0.174 | 0.134 |
| Number of brushings | 0.121 | -0.022 | 0.352 | 0.180 | -0.023 | 0.014 | 0.165 | -0.046 | 0.174 | 1.000 | 0.368 |
| Fluoride toothpaste | 0.191 | -0.006 | 0.364 | -0.233 | 0.129 | 0.111 | 0.129 | -0.146 | 0.134 | 0.368 | 1.000 |
| Sig. (1-tailed) | S-ECC |  | 0.405 | 0.000 | 0.000 | 0.014 | 0.000 | 0.000 | 0.000 | 0.000 | 0.001 | 0.000 |
| Sex | 0.405 |  | 0.264 | 0.220 | 0.265 | 0.193 | 0.154 | 0.370 | 0.082 | 0.294 | 0.436 |
| Age | 0.000 | 0.264 |  | 0.001 | 0.405 | 0.009 | 0.000 | 0.000 | 0.000 | 0.000 | 0.000 |
| Nationality | 0.000 | 0.220 | 0.001 |  | 0.000 | 0.206 | 0.000 | 0.000 | 0.001 | 0.000 | 0.000 |
| Mode of delivery | 0.014 | 0.265 | 0.405 | 0.000 |  | 0.371 | 0.207 | 0.121 | 0.241 | 0.281 | 0.001 |
| Exclusive breastfeeding | 0.000 | 0.193 | 0.009 | 0.206 | 0.371 |  | 0.000 | 0.000 | 0.428 | 0.359 | 0.003 |
| Breastfeeding (days) | 0.000 | 0.154 | 0.000 | 0.000 | 0.207 | 0.000 |  | 0.000 | 0.000 | 0.000 | 0.001 |
| Bottle | 0.000 | 0.370 | 0.000 | 0.000 | 0.121 | 0.000 | 0.000 |  | 0.125 | 0.125 | 0.000 |
| Cariogenic diet | 0.000 | 0.082 | 0.000 | 0.001 | 0.241 | 0.428 | 0.000 | 0.125 |  | 0.000 | 0.000 |
| Number of brushings | 0.001 | 0.294 | 0.000 | 0.000 | 0.281 | 0.359 | 0.000 | 0.125 | 0.000 |  | 0.000 |
| Fluoride toothpaste | 0.000 | 0.436 | 0.000 | 0.000 | 0.001 | 0.003 | 0.001 | 0.000 | 0.000 | 0.000 |  |
| N | S-ECC | 635 | 635 | 635 | 635 | 635 | 635 | 635 | 635 | 635 | 635 | 635 |
| Sex | 635 | 635 | 635 | 635 | 635 | 635 | 635 | 635 | 635 | 635 | 635 |
| Age | 635 | 635 | 635 | 635 | 635 | 635 | 635 | 635 | 635 | 635 | 635 |
| Nationality | 635 | 635 | 635 | 635 | 635 | 635 | 635 | 635 | 635 | 635 | 635 |
| Mode of delivery | 635 | 635 | 635 | 635 | 635 | 635 | 635 | 635 | 635 | 635 | 635 |
| Exclusive breastfeeding | 635 | 635 | 635 | 635 | 635 | 635 | 635 | 635 | 635 | 635 | 635 |
| Breastfeeding (days) | 635 | 635 | 635 | 635 | 635 | 635 | 635 | 635 | 635 | 635 | 635 |
| Bottle | 635 | 635 | 635 | 635 | 635 | 635 | 635 | 635 | 635 | 635 | 635 |
| Cariogenic diet | 635 | 635 | 635 | 635 | 635 | 635 | 635 | 635 | 635 | 635 | 635 |
| Number of brushings | 635 | 635 | 635 | 635 | 635 | 635 | 635 | 635 | 635 | 635 | 635 |
| Fluoride toothpaste | 635 | 635 | 635 | 635 | 635 | 635 | 635 | 635 | 635 | 635 | 635 |

| **Model Summaryb** | | | | |
| --- | --- | --- | --- | --- |
| Model | R | R Square | Adjusted R Square | Std. Error of the Estimate |
| 1 | ,439a | 0.193 | 0.179 | 5.17913 |
| a. Predictors: (Constant), Fluoride toothpaste, Sex, Exclusive breastfeeding, Mode of delivery, Bottle, Number of toothbrushes, Age, Nationality, Carigenic diet, Breastfeeding (days) | | | | |
| b. Dependent Variable: S-ECC (dmft) | | | | |

| **ANOVAa** | | | | | | |
| --- | --- | --- | --- | --- | --- | --- |
| Model | | Sum of Squares | df | Mean Square | F | Sig. |
| 1 | Regression | 3991.730 | 11 | 362.885 | 13.529 | **<.001b** |
| Residual | 16710.941 | 623 | 26.823 |  |  |
| Total | 20702.671 | 634 |  |  |  |
| a. Dependent Variable: S-ECC (dmft) | | | | | | |
| b. Predictors: (Constant), Fluoride toothpaste, Sex, Exclusive breastfeeding, Mode of delivery, Bottle, Number of toothbrushes, Age, Nationality, Carigenic diet, Breastfeeding (days) | | | | | | |
